# Supplementary material for: Age-related changes in CD4+CD25+FOXP3+ regulatory T cells and their relationship with lung cancer
Source: PLoS One. 2017 Mar 2;12(3):e0173048. doi: 10.1371/journal.pone.0173048 (PMC5333862; doi:10.1371/journal.pone.0173048)
Supplement: S2 File — (XLS) [file pone.0173048.s002.xls]

## Sheet: group by age
Foxp3 mRNA expression levels in the six groups
Lung cancer（group by age）			Healthy（group by age）
18-44(n=21)	45-59(n=25)	60-90(n=24)	18-44(n=20)	45-59(n=20)	60-90(n=20)
2.78	2.98	4.76	0.56	1.28	1.97
1.21	2.43	5.21	0.87	2.23	2.63
1.67	3.43	2.56	0.43	2.35	1.86
2.56	2.23	1.76	1.23	1.67	2.58
3.14	1.23	2.98	1.78	0.98	3.12
1.87	3.65	4.67	1.43	0.57	4.32
1.64	0.67	3.78	0.76	1.23	0.98
0.93	4.53	3.55	0.86	0.86	0.87
0.68	4.21	2.12	0.65	0.74	1.78
1.95	3.98	2.45	1.54	0.97	2.35
2.03	0.95	1.87	0.93	1.65	2.87
0.76	1.83	4.27	1.25	1.87	3.45
3.03	2.36	3.95	0.59	2.43	4.12
2.59	0.76	2.98	0.76	2.56	1.89
4.85	1.98	2.84	1.54	2.98	1.76
3.76	2.03	1.26	1.78	3.21	2.86
0.69	1.35	0.93	1.32	0.98	3.79
1.22	2.67	1.23	2.43	1.87	3.65
2.69	3.02	0.64	1.21	1.96	3.79
3.69	4.97	2.43	1.56	2.87	2.74
4.31	2.83	4.58
	1.96	3.24
	2.89	2.34
	1.45	4.21
	2.79

## Sheet: group by tumor stage
Foxp3 mRNA expression levels in cancer groups
Lung cancer（group by tumor stage）
Ⅰ（n=9）	Ⅱ（n=26）	Ⅲ（n=18）	Ⅳ（n=17）
1.21	2.78	4.76	2.98
2.43	2.56	3.14	5.21
1.67	2.69	3.76	3.43
0.69	2.23	1.64	3.69
0.76	1.22	1.87	4.85
0.68	2.59	3.65	4.31
0.67	3.03	3.55	4.53
0.76	2.03	2.98	4.21
1.35	1.95	2.84	3.98
	0.93	2.43	4.67
	1.23	3.24	3.78
	0.95	4.21	4.27
	1.83	1.98	3.95
	2.36	2.67	4.58
	2.56	3.02	4.97
	1.76	2.83	1.96
	2.98	1.45	2.89
	2.12	2.79
	2.45
	1.87
	1.26
	0.93
	1.23
	0.64
	2.34
	2.03
